# Supplementary material for: Genome-Wide Analysis of Differentially Expressed miRNAs and Their Associated Regulatory Networks in Lenses Deficient for the Congenital Cataract-Linked Tudor Domain Containing Protein TDRD7
Source: Front Cell Dev Biol. 2021 Feb 16;9:615761. doi: 10.3389/fcell.2021.615761 (PMC7921330; doi:10.3389/fcell.2021.615761)
Supplement: Supplementary file 2 [file Table_2.XLSX]

## Sheet: Sheet3
Table S2. Gene ontology (GO) categories for 98 candidate reduced mRNA targets in elevated miRNA group
Annotation Cluster 1	Enrichment Score: 2.2846453251830865
Category	Term	Count	Genes	PValue	FDR
UP_KEYWORDS	Cell projection	10	ZFP385A, RILPL2, NCDN, ANKS1, PLEKHG5, CTNND2, RGS8, OLFM1, MYLK, AATK	0.00249195	3.02654
GOTERM_CC_DIRECT	GO:0042995~cell projection	10	ZFP385A, RILPL2, NCDN, PLEKHG5, CTNND2, RGS8, CX3CL1, OLFM1, MYLK, AATK	0.00653191	7.56842
GOTERM_CC_DIRECT	GO:0030425~dendrite	8	ZFP385A, NCDN, MAP1LC3B, DLGAP4, CTNND2, CHRNA4, RGS8, AATK	0.00859971	9.85257
Annotation Cluster 2	Enrichment Score: 2.1231724772196747
Category	Term	Count	Genes	PValue	FDR
INTERPRO	IPR002219:Protein kinase C-like, phorbol ester/diacylglycerol binding	4	RASSF5, PLEKHM1, RASGRP1, PRKCD	0.00342306	4.30372
SMART	SM00109:C1	4	RASSF5, PLEKHM1, RASGRP1, PRKCD	0.0043796	4.40189
GOTERM_BP_DIRECT	GO:0035556~intracellular signal transduction	7	RASSF5, PLEKHM1, PPP1R1A, RASGRP1, GNA12, WNK2, PRKCD	0.0126814	17.5588
UP_SEQ_FEATURE	zinc finger region:Phorbol-ester/DAG-type	3	RASSF5, PLEKHM1, RASGRP1	0.0169158	21.2307
Annotation Cluster 3	Enrichment Score: 1.3163695064306933
Category	Term	Count	Genes	PValue	FDR
GOTERM_CC_DIRECT	GO:0005604~basement membrane	4	COL4A3, TIMP2, TIMP3, LOXL1	0.0109643	12.4011
GOTERM_CC_DIRECT	GO:0005578~proteinaceous extracellular matrix	5	COL4A3, WNT7B, LTBP3, TIMP3, LOXL1	0.0630024	54.2283
GOTERM_CC_DIRECT	GO:0031012~extracellular matrix	4	LTBP3, TIMP2, TIMP3, LOXL1	0.162762	88.157
Annotation Cluster 4	Enrichment Score: 1.2280811246616512
Category	Term	Count	Genes	PValue	FDR
UP_KEYWORDS	Zinc	17	YPEL1, ZFP385A, ALAD, ADARB1, KLF9, USP2, PLEKHM1, ZXDC, TIMP2, PRKCD, ZFYVE21, TIMP3, HDAC4, RASSF5, RASGRP1, CASZ1, USP45	0.0161608	18.1831
UP_KEYWORDS	UP_KEYWORDS~Metal-binding	23	YPEL1, GALNT2, ZFP385A, ALAD, ADARB1, KLF9, USP2, PLEKHM1, GNA12, ZXDC, EGLN2, TIMP2, TIMP3, ZFYVE21, PRKCD, HDAC4, RASSF5, PPM1E, RASGRP1, CASZ1, LOXL1, USP45, MYLK	0.0279173	29.4439
GOTERM_MF_DIRECT	GO:0046872~metal ion binding	23	YPEL1, GALNT2, ZFP385A, ALAD, ADARB1, KLF9, USP2, PLEKHM1, GNA12, ZXDC, EGLN2, TIMP2, TIMP3, ZFYVE21, PRKCD, HDAC4, RASSF5, PPM1E, RASGRP1, CASZ1, LOXL1, USP45, MYLK	0.120232	80.8605
UP_KEYWORDS	Zinc-finger	10	ZFP385A, RASSF5, KLF9, PLEKHM1, RASGRP1, ZXDC, CASZ1, ZFYVE21, PRKCD, USP45	0.225589	95.7105
Annotation Cluster 5	Enrichment Score: 1.1974849797352984
Category	Term	Count	Genes	PValue	FDR
UP_KEYWORDS	Endosome	8	NPC1, PTP4A3, PLEKHM1, RHOB, ABCA2, TSPAN15, ZFYVE21, SNX11	0.0029394	3.56099
GOTERM_CC_DIRECT	GO:0005768~endosome	8	NPC1, PTP4A3, PACSIN3, PLEKHM1, RHOB, ABCA2, ZFYVE21, SNX11	0.0146432	16.235
GOTERM_CC_DIRECT	GO:0005765~lysosomal membrane	4	NPC1, PLEKHM1, H2-EB1, ABCA2	0.0994351	71.5715
GOTERM_CC_DIRECT	GO:0010008~endosome membrane	3	PLEKHM1, RHOB, ABCA2	0.113644	76.5142
UP_KEYWORDS	Lysosome	3	NPC1, PLEKHM1, ABCA2	0.288288	98.4838
GOTERM_CC_DIRECT	GO:0005764~lysosome	3	NPC1, PLEKHM1, ABCA2	0.465888	99.9464
Annotation Cluster 6	Enrichment Score: 1.1814524896933107
Category	Term	Count	Genes	PValue	FDR
GOTERM_CC_DIRECT	GO:0005811~lipid particle	3	CYB5R3, DGAT2, PNPLA2	0.0390414	38.0139
GOTERM_BP_DIRECT	GO:0006629~lipid metabolic process	6	CYB5R3, NPC1, CPT2, DGAT2, PNPLA2, LPIN1	0.0704271	66.8748
UP_KEYWORDS	Lipid metabolism	5	CYB5R3, NPC1, CPT2, DGAT2, PNPLA2	0.103843	74.0886
Annotation Cluster 7	Enrichment Score: 1.00058140324585
Category	Term	Count	Genes	PValue	FDR
GOTERM_BP_DIRECT	GO:0006511~ubiquitin-dependent protein catabolic process	5	USP2, FBXO4, STUB1, USP42, USP45	0.00651697	9.41832
INTERPRO	IPR018200:Peptidase C19, ubiquitin carboxyl-terminal hydrolase 2, conserved site	3	USP2, USP42, USP45	0.0244284	27.1881
INTERPRO	IPR001394:Peptidase C19, ubiquitin carboxyl-terminal hydrolase 2	3	USP2, USP42, USP45	0.0270614	29.6694
GOTERM_BP_DIRECT	GO:0016579~protein deubiquitination	3	USP2, USP42, USP45	0.0543114	57.0372
GOTERM_MF_DIRECT	GO:0036459~thiol-dependent ubiquitinyl hydrolase activity	3	USP2, USP42, USP45	0.0588625	54.2988
GOTERM_MF_DIRECT	GO:0004843~thiol-dependent ubiquitin-specific protease activity	3	USP2, USP42, USP45	0.0643421	57.6168
UP_KEYWORDS	Thiol protease	3	USP2, USP42, USP45	0.112415	76.9816
GOTERM_MF_DIRECT	GO:0008234~cysteine-type peptidase activity	3	USP2, USP42, USP45	0.16188	89.7652
GOTERM_MF_DIRECT	GO:0008233~peptidase activity	5	APH1A, USP2, HTRA3, USP42, USP45	0.269594	98.2664
UP_KEYWORDS	Hydrolase	10	HDAC4, ADARB1, PPM1E, PTP4A3, USP2, PNPLA2, HTRA3, USP42, LPIN1, USP45	0.270914	97.9593
GOTERM_MF_DIRECT	GO:0016787~hydrolase activity	10	HDAC4, ADARB1, PPM1E, PTP4A3, USP2, PNPLA2, HTRA3, USP42, LPIN1, USP45	0.381041	99.7954
UP_KEYWORDS	Protease	4	USP2, HTRA3, USP42, USP45	0.40993	99.8493
GOTERM_BP_DIRECT	GO:0006508~proteolysis	4	USP2, HTRA3, USP42, USP45	0.534176	99.999
Annotation Cluster 8	Enrichment Score: 0.9208273304584601
Category	Term	Count	Genes	PValue	FDR
GOTERM_BP_DIRECT	GO:0007264~small GTPase mediated signal transduction	6	RASL11B, ARL2, RASGRP1, GNA12, RHOB, RRAS	0.00563315	8.19149
UP_KEYWORDS	Lipoprotein	10	CYB5R3, ARL2, EDNRB, WNT7B, PTP4A3, MAP1LC3B, GNA12, CHRNA4, RHOB, RRAS	0.00620814	7.38389
GOTERM_MF_DIRECT	GO:0019003~GDP binding	3	ARL2, RHOB, RRAS	0.037627	39.0455
INTERPRO	IPR005225:Small GTP-binding protein domain	4	RASL11B, ARL2, RHOB, RRAS	0.0398722	40.6673
UP_KEYWORDS	GTP-binding	5	RASL11B, ARL2, GNA12, RHOB, RRAS	0.0542634	49.7021
UP_SEQ_FEATURE	nucleotide phosphate-binding region:GTP	5	RASL11B, ARL2, GNA12, RHOB, RRAS	0.0806744	69.1681
GOTERM_CC_DIRECT	GO:0005925~focal adhesion	5	GNA12, CD81, RHOB, RRAS, ZFYVE21	0.114386	76.749
INTERPRO	IPR001806:Small GTPase superfamily	3	RASL11B, RHOB, RRAS	0.125023	81.9757
UP_KEYWORDS	Nucleotide-binding	12	RASL11B, ARL2, GNA12, PIP5K1B, GPSM2, RHOB, RRAS, ABCA2, WNK2, PRKCD, MYLK, AATK	0.128696	81.675
GOTERM_MF_DIRECT	GO:0005525~GTP binding	5	RASL11B, ARL2, GNA12, RHOB, RRAS	0.132102	83.9386
UP_KEYWORDS	Kinase	6	PACSIN3, PIP5K1B, WNK2, PRKCD, MYLK, AATK	0.185725	92.0397
GOTERM_MF_DIRECT	GO:0016301~kinase activity	6	PACSIN3, PIP5K1B, WNK2, PRKCD, MYLK, AATK	0.260565	97.9684
GOTERM_MF_DIRECT	GO:0003924~GTPase activity	3	ARL2, GNA12, RRAS	0.288772	98.7703
GOTERM_BP_DIRECT	GO:0016310~phosphorylation	5	PIP5K1B, WNK2, PRKCD, MYLK, AATK	0.340068	99.8141
GOTERM_MF_DIRECT	GO:0000166~nucleotide binding	12	RASL11B, ARL2, GNA12, PIP5K1B, GPSM2, RHOB, RRAS, ABCA2, WNK2, PRKCD, MYLK, AATK	0.400341	99.8641
INTERPRO	IPR027417:P-loop containing nucleoside triphosphate hydrolase	6	RASL11B, ARL2, GNA12, RHOB, RRAS, ABCA2	0.400939	99.8603
UP_KEYWORDS	ATP-binding	6	PIP5K1B, ABCA2, WNK2, PRKCD, MYLK, AATK	0.700037	100
GOTERM_MF_DIRECT	GO:0005524~ATP binding	6	PIP5K1B, ABCA2, WNK2, PRKCD, MYLK, AATK	0.892506	100
Annotation Cluster 9	Enrichment Score: 0.9095159946583631
Category	Term	Count	Genes	PValue	FDR
GOTERM_BP_DIRECT	GO:0006897~endocytosis	4	NPC1, PACSIN3, SNX11, EPN2	0.0568085	58.7218
GOTERM_MF_DIRECT	GO:0008289~lipid binding	4	PACSIN3, GLTP, SNX11, EPN2	0.159501	89.3839
UP_KEYWORDS	Lipid-binding	3	PACSIN3, SNX11, EPN2	0.206194	94.1826
Annotation Cluster 10	Enrichment Score: 0.8266886556940044
Category	Term	Count	Genes	PValue	FDR
GOTERM_CC_DIRECT	GO:0016020~membrane	50	CYB5R3, CPT2, PLEKHM1, GNA12, G6PDX, PIP5K1B, LEMD2, SLC35A2, EDNRB, TMEM108, PACSIN3, MAP1LC3B, SLC24A3, SLC2A1, CHRNA4, RRAS, RHOB, PQLC1, PIGT, PNPLA2, WNK2, LPIN1, PRKCD, NPC1, DGAT2, SLC35E3, CLIC5, CD81, SNX11, GALNT2, APH1A, ABCA2, ST8SIA2, CX3CL1, RILPL2, SHISA4, RASGRP1, PLEKHG5, TTYH1, AATK, NCDN, DLGAP4, TSPAN15, LIN7A, RASL11B, ANKRD46, PTP4A3, H2-EB1, YIPF3, RGS8	0.000533519	0.638845
UP_KEYWORDS	Membrane	47	CYB5R3, GALNT2, CPT2, APH1A, PLEKHM1, GNA12, LEMD2, PIP5K1B, ABCA2, CX3CL1, ST8SIA2, SLC35A2, EDNRB, TMEM108, PACSIN3, MAP1LC3B, SLC24A3, RASGRP1, SHISA4, TTYH1, SLC2A1, PLEKHG5, CHRNA4, RHOB, RRAS, PQLC1, AATK, ADARB1, DLGAP4, PIGT, PNPLA2, WNK2, TSPAN15, LPIN1, PRKCD, LIN7A, NPC1, ANKRD46, PTP4A3, DGAT2, SLC35E3, CLIC5, H2-EB1, CD81, YIPF3, RGS8, SNX11	0.04114	40.3967
UP_SEQ_FEATURE	transmembrane region	27	GALNT2, APH1A, LEMD2, UBE2V1, ABCA2, CX3CL1, ST8SIA2, SLC35A2, EDNRB, TMEM108, SLC24A3, SHISA4, SLC2A1, TTYH1, CHRNA4, PQLC1, AATK, PIGT, PNPLA2, NPC1, ANKRD46, DGAT2, SLC35E3, CLIC5, CD81, H2-EB1, YIPF3	0.195636	95.2417
UP_SEQ_FEATURE	topological domain:Cytoplasmic	14	GALNT2, PIGT, PNPLA2, ST8SIA2, CX3CL1, EDNRB, TMEM108, SLC24A3, SHISA4, CD81, TTYH1, H2-EB1, SLC2A1, CHRNA4	0.729175	100
UP_KEYWORDS	Transmembrane helix	28	GALNT2, APH1A, LEMD2, ABCA2, CX3CL1, ST8SIA2, SLC35A2, EDNRB, TMEM108, SLC24A3, SHISA4, SLC2A1, TTYH1, CHRNA4, PQLC1, AATK, ADARB1, PIGT, PNPLA2, TSPAN15, NPC1, ANKRD46, DGAT2, SLC35E3, CLIC5, CD81, H2-EB1, YIPF3	0.75588	100
UP_KEYWORDS	Transmembrane	28	GALNT2, APH1A, LEMD2, ABCA2, CX3CL1, ST8SIA2, SLC35A2, EDNRB, TMEM108, SLC24A3, SHISA4, SLC2A1, TTYH1, CHRNA4, PQLC1, AATK, ADARB1, PIGT, PNPLA2, TSPAN15, NPC1, ANKRD46, DGAT2, SLC35E3, CLIC5, CD81, H2-EB1, YIPF3	0.760849	100
GOTERM_CC_DIRECT	GO:0016021~integral component of membrane	28	GALNT2, APH1A, LEMD2, ABCA2, CX3CL1, ST8SIA2, SLC35A2, EDNRB, TMEM108, SLC24A3, SHISA4, SLC2A1, TTYH1, CHRNA4, PQLC1, AATK, ADARB1, PIGT, PNPLA2, TSPAN15, NPC1, ANKRD46, DGAT2, SLC35E3, CLIC5, CD81, H2-EB1, YIPF3	0.907263	100
Annotation Cluster 11	Enrichment Score: 0.6901302374787343
Category	Term	Count	Genes	PValue	FDR
UP_KEYWORDS	Glycoprotein	23	COL4A3, GALNT2, CEACAM10, LTBP3, CTNND2, PIGT, ABCA2, PNPLA2, TSPAN15, ST8SIA2, TST, EDNRB, WNT7B, NPC1, TMEM108, SLC24A3, SLC2A1, TTYH1, H2-EB1, CFH, YIPF3, CHRNA4, OLFM1	0.0828787	65.5497
UP_KEYWORDS	Secreted	12	COL4A3, GALNT2, WNT7B, CEACAM10, LTBP3, CFH, CX3CL1, HTRA3, TIMP2, TIMP3, LOXL1, OLFM1	0.104984	74.492
UP_KEYWORDS	Disulfide bond	19	COL4A3, GALNT2, LTBP3, PIGT, CX3CL1, ST8SIA2, TIMP2, TIMP3, EDNRB, WNT7B, NPC1, PTP4A3, CD81, H2-EB1, CFH, CHRNA4, LOXL1, OLFM1, MYLK	0.113376	77.2865
GOTERM_CC_DIRECT	GO:0005576~extracellular region	13	COL4A3, GALNT2, NPC1, WNT7B, CEACAM10, LTBP3, CFH, CX3CL1, HTRA3, TIMP2, TIMP3, LOXL1, OLFM1	0.123355	79.4246
GOTERM_CC_DIRECT	GO:0005615~extracellular space	11	TST, ALAD, WNT7B, CEACAM10, PPP1R1A, CFH, CX3CL1, TIMP2, TIMP3, LOXL1, OLFM1	0.172728	89.7432
UP_SEQ_FEATURE	signal peptide	19	COL4A3, CEACAM10, LTBP3, PIGT, CX3CL1, TIMP2, TIMP3, EDNRB, WNT7B, NPC1, TMEM108, SLC24A3, SHISA4, H2-EB1, CFH, CHRNA4, HTRA3, LOXL1, OLFM1	0.326295	99.6013
UP_SEQ_FEATURE	disulfide bond	15	GALNT2, COL4A3, LTBP3, PIGT, ST8SIA2, CX3CL1, TIMP2, TIMP3, EDNRB, PTP4A3, CD81, H2-EB1, CFH, CHRNA4, OLFM1	0.405369	99.9305
UP_SEQ_FEATURE	glycosylation site:N-linked (GlcNAc...)	20	COL4A3, GALNT2, CEACAM10, LTBP3, PIGT, ABCA2, PNPLA2, ST8SIA2, EDNRB, WNT7B, NPC1, TMEM108, DGAT2, SLC24A3, TTYH1, H2-EB1, SLC2A1, CFH, CHRNA4, OLFM1	0.458142	99.9811
UP_KEYWORDS	Signal	21	COL4A3, CEACAM10, LTBP3, PIGT, CX3CL1, ST8SIA2, TIMP2, TIMP3, EDNRB, WNT7B, NPC1, TMEM108, SLC24A3, SHISA4, H2-EB1, CFH, CHRNA4, HTRA3, LOXL1, OLFM1, AATK	0.482795	99.9703
Annotation Cluster 12	Enrichment Score: 0.6133027765013158
Category	Term	Count	Genes	PValue	FDR
GOTERM_CC_DIRECT	GO:0005813~centrosome	5	ARL2, RILPL2, USP2, G6PDX, KLHL22	0.151003	85.9973
UP_KEYWORDS	Cell cycle	5	ARL2, ZFP385A, USP2, KLHL22, PRKCD	0.279734	98.2434
GOTERM_BP_DIRECT	GO:0007049~cell cycle	5	ARL2, ZFP385A, USP2, KLHL22, PRKCD	0.342265	99.8233
Annotation Cluster 13	Enrichment Score: 0.5732729168162805
Category	Term	Count	Genes	PValue	FDR
UP_KEYWORDS	Tumor suppressor	3	RASSF5, RHOB, PRKCD	0.104198	74.2146
GOTERM_BP_DIRECT	GO:0006915~apoptotic process	5	ZFP385A, RASSF5, RHOB, PRKCD, AATK	0.294202	99.4863
UP_KEYWORDS	Apoptosis	3	RASSF5, RHOB, PRKCD	0.621839	99.9994
Annotation Cluster 14	Enrichment Score: 0.5308368948160529
Category	Term	Count	Genes	PValue	FDR
UP_KEYWORDS	Cell junction	6	PLEKHG5, CTNND2, CHRNA4, ZFYVE21, OLFM1, LIN7A	0.153389	87.1397
GOTERM_CC_DIRECT	GO:0030054~cell junction	6	PLEKHG5, CTNND2, CHRNA4, ZFYVE21, OLFM1, LIN7A	0.252677	96.9737
GOTERM_CC_DIRECT	GO:0045202~synapse	4	DLGAP4, CHRNA4, OLFM1, LIN7A	0.428862	99.8802
UP_KEYWORDS	Synapse	3	CHRNA4, OLFM1, LIN7A	0.452873	99.9406
Annotation Cluster 15	Enrichment Score: 0.38988537032317455
Category	Term	Count	Genes	PValue	FDR
UP_KEYWORDS	Transferase	11	TST, GALNT2, CPT2, DGAT2, PACSIN3, PIP5K1B, WNK2, ST8SIA2, PRKCD, MYLK, AATK	0.168947	89.7665
UP_KEYWORDS	Kinase	6	PACSIN3, PIP5K1B, WNK2, PRKCD, MYLK, AATK	0.185725	92.0397
GOTERM_BP_DIRECT	GO:0046777~protein autophosphorylation	3	WNK2, PRKCD, AATK	0.220045	97.6713
UP_KEYWORDS	Serine/threonine-protein kinase	4	WNK2, PRKCD, MYLK, AATK	0.250469	97.131
GOTERM_MF_DIRECT	GO:0016301~kinase activity	6	PACSIN3, PIP5K1B, WNK2, PRKCD, MYLK, AATK	0.260565	97.9684
UP_SEQ_FEATURE	active site:Proton acceptor	6	CPT2, G6PDX, WNK2, PRKCD, MYLK, AATK	0.29694	99.2761
GOTERM_MF_DIRECT	GO:0016740~transferase activity	10	TST, GALNT2, CPT2, DGAT2, PIP5K1B, WNK2, ST8SIA2, PRKCD, MYLK, AATK	0.335973	99.4932
GOTERM_BP_DIRECT	GO:0016310~phosphorylation	5	PIP5K1B, WNK2, PRKCD, MYLK, AATK	0.340068	99.8141
GOTERM_MF_DIRECT	GO:0004674~protein serine/threonine kinase activity	4	WNK2, PRKCD, MYLK, AATK	0.373551	99.7611
INTERPRO	IPR000719:Protein kinase, catalytic domain	4	WNK2, PRKCD, MYLK, AATK	0.418718	99.9051
INTERPRO	IPR008271:Serine/threonine-protein kinase, active site	3	WNK2, PRKCD, MYLK	0.450627	99.954
INTERPRO	IPR011009:Protein kinase-like domain	4	WNK2, PRKCD, MYLK, AATK	0.468026	99.9696
UP_SEQ_FEATURE	domain:Protein kinase	4	WNK2, PRKCD, MYLK, AATK	0.474882	99.9878
GOTERM_MF_DIRECT	GO:0004672~protein kinase activity	4	WNK2, PRKCD, MYLK, AATK	0.511656	99.9904
GOTERM_BP_DIRECT	GO:0006468~protein phosphorylation	4	WNK2, PRKCD, MYLK, AATK	0.527133	99.9988
INTERPRO	IPR017441:Protein kinase, ATP binding site	3	PRKCD, MYLK, AATK	0.539516	99.9952
UP_SEQ_FEATURE	binding site:ATP	4	WNK2, PRKCD, MYLK, AATK	0.576006	99.9994
SMART	SM00220:S_TKc	3	WNK2, PRKCD, MYLK	0.59098	99.9896
UP_KEYWORDS	ATP-binding	6	PIP5K1B, ABCA2, WNK2, PRKCD, MYLK, AATK	0.700037	100
UP_SEQ_FEATURE	nucleotide phosphate-binding region:ATP	4	WNK2, PRKCD, MYLK, AATK	0.875967	100
GOTERM_MF_DIRECT	GO:0005524~ATP binding	6	PIP5K1B, ABCA2, WNK2, PRKCD, MYLK, AATK	0.892506	100
Annotation Cluster 16	Enrichment Score: 0.3196245664960914
Category	Term	Count	Genes	PValue	FDR
GOTERM_BP_DIRECT	GO:0000122~negative regulation of transcription from RNA polymerase II promoter	7	HDAC4, EDNRB, USP2, PER2, NFIX, NFIC, LPIN1	0.138773	89.5674
UP_KEYWORDS	Transcription regulation	11	HDAC4, ZFP385A, KLF9, MED9, ZXDC, PER2, CASZ1, CTNND2, NFIX, NFIC, LPIN1	0.239272	96.5561
UP_KEYWORDS	Transcription	11	HDAC4, ZFP385A, KLF9, MED9, ZXDC, PER2, CASZ1, CTNND2, NFIX, NFIC, LPIN1	0.27125	97.9709
UP_KEYWORDS	Nucleus	23	ARL2, YPEL1, ZFP385A, ADARB1, KLF9, USP2, ZXDC, LEMD2, CTNND2, UBE2V1, EGLN2, NFIX, STUB1, PRKCD, LPIN1, HDAC4, PPM1E, MED9, PER2, CASZ1, RHOB, RGS8, NFIC	0.289728	98.5212
UP_SEQ_FEATURE	zinc finger region:C2H2-type 3	3	KLF9, ZXDC, CASZ1	0.386003	99.8912
UP_SEQ_FEATURE	zinc finger region:C2H2-type 1	3	KLF9, ZXDC, CASZ1	0.389628	99.8998
UP_SEQ_FEATURE	zinc finger region:C2H2-type 2	3	KLF9, ZXDC, CASZ1	0.398651	99.9186
GOTERM_BP_DIRECT	GO:0006351~transcription, DNA-templated	11	HDAC4, ZFP385A, KLF9, MED9, ZXDC, PER2, CASZ1, CTNND2, NFIX, NFIC, LPIN1	0.422124	99.9751
UP_KEYWORDS	Activator	4	MED9, ZXDC, NFIX, NFIC	0.501346	99.981
GOTERM_BP_DIRECT	GO:0045944~positive regulation of transcription from RNA polymerase II promoter	6	HDAC4, KLF9, CD81, NFIX, NFIC, LPIN1	0.52584	99.9987
INTERPRO	IPR015880:Zinc finger, C2H2-like	4	ZFP385A, KLF9, ZXDC, CASZ1	0.617124	99.9996
INTERPRO	IPR007087:Zinc finger, C2H2	4	ZFP385A, KLF9, ZXDC, CASZ1	0.653252	99.9999
SMART	SM00355:ZnF_C2H2	4	ZFP385A, KLF9, ZXDC, CASZ1	0.705846	99.9996
GOTERM_BP_DIRECT	GO:0006355~regulation of transcription, DNA-templated	10	HDAC4, ZFP385A, KLF9, MED9, ZXDC, CASZ1, CTNND2, NFIX, NFIC, LPIN1	0.783398	100
UP_KEYWORDS	DNA-binding	4	KLF9, CASZ1, NFIX, NFIC	0.971498	100
GOTERM_MF_DIRECT	GO:0003677~DNA binding	5	HDAC4, KLF9, CASZ1, NFIX, NFIC	0.9881	100
GOTERM_MF_DIRECT	GO:0003676~nucleic acid binding	3	ZFP385A, KLF9, ZXDC	0.988943	100
Annotation Cluster 17	Enrichment Score: 0.3164477025139822
Category	Term	Count	Genes	PValue	FDR
UP_KEYWORDS	Ion channel	3	CLIC5, TTYH1, CHRNA4	0.422309	99.8839
UP_KEYWORDS	Ion transport	4	SLC24A3, CLIC5, TTYH1, CHRNA4	0.495962	99.9784
GOTERM_BP_DIRECT	GO:0006811~ion transport	4	SLC24A3, CLIC5, TTYH1, CHRNA4	0.536511	99.9991
Annotation Cluster 18	Enrichment Score: 0.23489118339463538
Category	Term	Count	Genes	PValue	FDR
UP_KEYWORDS	Oxidoreductase	4	CYB5R3, G6PDX, EGLN2, LOXL1	0.517326	99.9873
GOTERM_MF_DIRECT	GO:0016491~oxidoreductase activity	4	CYB5R3, G6PDX, EGLN2, LOXL1	0.599519	99.9993
GOTERM_BP_DIRECT	GO:0055114~oxidation-reduction process	4	CYB5R3, G6PDX, EGLN2, LOXL1	0.636443	100
