# Supplementary material for: Genome-Wide Analysis of Differentially Expressed miRNAs and Their Associated Regulatory Networks in Lenses Deficient for the Congenital Cataract-Linked Tudor Domain Containing Protein TDRD7
Source: Front Cell Dev Biol. 2021 Feb 16;9:615761. doi: 10.3389/fcell.2021.615761 (PMC7921330; doi:10.3389/fcell.2021.615761)
Supplement: Supplementary file 3 [file Table_3.XLSX]

## Sheet: Sheet2
Table S3. Gene ontology (GO) categories for 89 candidate elevated mRNA targets in reduced miRNA group
Annotation Cluster 1	Enrichment Score: 2.0541306154511325
Category	Term	Count	Genes	PValue	FDR
UP_KEYWORDS	Translation regulation	4	DDX3X, PAIP2, PAIP1, PUM2	0.0014433	1.5933
GOTERM_BP_DIRECT	GO:0006417~regulation of translation	4	DDX3X, PAIP2, PAIP1, PUM2	0.00359779	4.79588
GOTERM_MF_DIRECT	GO:0003723~RNA binding	5	DDX3X, EIF4A2, PAIP1, TSN, PUM2	0.1325	79.8753
Annotation Cluster 2	Enrichment Score: 1.6239377406008146
Category	Term	Count	Genes	PValue	FDR
GOTERM_BP_DIRECT	GO:0006886~intracellular protein transport	5	STX12, BCAP29, TOM1, VPS35, SAR1B	0.00282504	3.78414
GOTERM_BP_DIRECT	GO:0006810~transport	12	CUL3, STX12, BCAP29, SYPL, TOM1, VPS35, NDUFC1, CP, SAR1B, SLC7A11, KPNA1, GLRX2	0.00507215	6.6989
UP_KEYWORDS	Transport	11	CUL3, STX12, BCAP29, TOM1, VPS35, NDUFC1, CP, SAR1B, SLC7A11, KPNA1, GLRX2	0.0077035	8.24018
UP_KEYWORDS	Protein transport	6	STX12, BCAP29, TOM1, VPS35, SAR1B, KPNA1	0.00864711	9.20584
GOTERM_BP_DIRECT	GO:0015031~protein transport	6	STX12, BCAP29, TOM1, VPS35, SAR1B, KPNA1	0.0167789	20.6049
GOTERM_CC_DIRECT	GO:0005768~endosome	3	STX12, TOM1, VPS35	0.364936	99.4132
GOTERM_CC_DIRECT	GO:0005622~intracellular	4	STX12, UBE2K, TOM1, SAR1B	0.733973	100
Annotation Cluster 3	Enrichment Score: 1.5653863038312423
Category	Term	Count	Genes	PValue	FDR
GOTERM_MF_DIRECT	GO:0031625~ubiquitin protein ligase binding	6	UBE2N, CUL3, BTBD1, UBE2K, ABI2, CUL1	0.000712922	0.80118
KEGG_PATHWAY	mmu04120:Ubiquitin mediated proteolysis	4	UBE2N, CUL3, UBE2K, CUL1	0.00558001	4.6548
GOTERM_MF_DIRECT	GO:0061630~ubiquitin protein ligase activity	4	UBE2N, CUL3, UBE2K, CUL1	0.0137378	14.4463
GOTERM_BP_DIRECT	GO:0042787~protein ubiquitination involved in ubiquitin-dependent protein catabolic process	3	CUL3, BTBD1, CUL1	0.0456413	47.1124
UP_KEYWORDS	Ubl conjugation	8	UBE2N, CUL3, DDX3X, PAIP2, UBE2K, DAZAP2, CUL1, KPNA1	0.0458437	40.6574
GOTERM_MF_DIRECT	GO:0004842~ubiquitin-protein transferase activity	4	UBE2N, CUL3, UBE2K, CUL1	0.0487877	43.1164
UP_KEYWORDS	Ubl conjugation pathway	5	UBE2N, CUL3, BTBD1, UBE2K, CUL1	0.0499894	43.4624
UP_KEYWORDS	Isopeptide bond	6	UBE2N, CUL3, DDX3X, UBE2K, NAP1L1, CUL1	0.0579597	48.5188
GOTERM_BP_DIRECT	GO:0006511~ubiquitin-dependent protein catabolic process	3	UBE2N, CUL3, CUL1	0.0584584	56.0172
GOTERM_BP_DIRECT	GO:0016567~protein ubiquitination	3	UBE2N, CUL3, CUL1	0.234824	97.3998
Annotation Cluster 4	Enrichment Score: 1.2255518547322661
Category	Term	Count	Genes	PValue	FDR
GOTERM_BP_DIRECT	GO:0006915~apoptotic process	6	DDX3X, SH3GLB1, BNIP3L, BCAP29, PDCD5, CUL1	0.0144595	18.0126
UP_KEYWORDS	Apoptosis	5	DDX3X, SH3GLB1, BNIP3L, BCAP29, PDCD5	0.022525	22.38
UP_KEYWORDS	Mitochondrion outer membrane	3	DDX3X, SH3GLB1, BNIP3L	0.0249614	24.5045
GOTERM_CC_DIRECT	GO:0005741~mitochondrial outer membrane	3	DDX3X, SH3GLB1, BNIP3L	0.0498251	43.921
UP_KEYWORDS	Mitochondrion	6	DDX3X, SH3GLB1, BNIP3L, NDUFC1, OXR1, GLRX2	0.0825608	61.6421
GOTERM_BP_DIRECT	GO:0043065~positive regulation of apoptotic process	3	DDX3X, BNIP3L, PDCD5	0.209497	95.9464
GOTERM_CC_DIRECT	GO:0005739~mitochondrion	6	DDX3X, SH3GLB1, BNIP3L, NDUFC1, OXR1, GLRX2	0.376401	99.5226
Annotation Cluster 5	Enrichment Score: 1.21211913869032
Category	Term	Count	Genes	PValue	FDR
GOTERM_MF_DIRECT	GO:0044822~poly(A) RNA binding	8	UBE2N, DDX3X, EIF4A2, EIF5, NAP1L1, PUM2, ETF1, NAP1L4	0.020369	20.7148
UP_KEYWORDS	Protein biosynthesis	3	EIF4A2, EIF5, ETF1	0.0417408	37.7573
GOTERM_BP_DIRECT	GO:0006412~translation	3	EIF4A2, EIF5, ETF1	0.271713	98.6745
Annotation Cluster 6	Enrichment Score: 0.8244704725947579
Category	Term	Count	Genes	PValue	FDR
GOTERM_BP_DIRECT	GO:0016192~vesicle-mediated transport	4	CUL3, STX12, BCAP29, SAR1B	0.0168705	20.7056
UP_KEYWORDS	Golgi apparatus	4	CUL3, STX12, SH3GLB1, SAR1B	0.230615	94.5812
GOTERM_CC_DIRECT	GO:0000139~Golgi membrane	3	CUL3, STX12, SH3GLB1	0.242956	95.7145
GOTERM_CC_DIRECT	GO:0005794~Golgi apparatus	4	CUL3, STX12, SH3GLB1, SAR1B	0.532814	99.9818
Annotation Cluster 7	Enrichment Score: 0.6764191338017821
Category	Term	Count	Genes	PValue	FDR
GOTERM_BP_DIRECT	GO:0006413~translational initiation	3	DDX3X, EIF4A2, EIF5	0.00832961	10.7792
UP_KEYWORDS	Nucleotide-binding	8	UBE2N, CBWD1, DDX3X, RIOK3, UBE2K, EIF4A2, EIF5, SAR1B	0.0886212	64.3675
UP_KEYWORDS	ATP-binding	6	UBE2N, CBWD1, DDX3X, RIOK3, UBE2K, EIF4A2	0.180029	88.9992
GOTERM_MF_DIRECT	GO:0000166~nucleotide binding	8	UBE2N, CBWD1, DDX3X, RIOK3, UBE2K, EIF4A2, EIF5, SAR1B	0.210849	93.081
GOTERM_MF_DIRECT	GO:0005524~ATP binding	6	UBE2N, CBWD1, DDX3X, RIOK3, UBE2K, EIF4A2	0.330301	98.9134
INTERPRO	IPR027417:P-loop containing nucleoside triphosphate hydrolase	4	CBWD1, DDX3X, EIF4A2, SAR1B	0.343914	99.2409
UP_SEQ_FEATURE	nucleotide phosphate-binding region:ATP	4	CBWD1, DDX3X, RIOK3, EIF4A2	0.490969	99.981
UP_KEYWORDS	Transferase	4	UBE2N, RIOK3, UBE2K, GLRX2	0.716475	99.9999
GOTERM_MF_DIRECT	GO:0016740~transferase activity	4	UBE2N, RIOK3, UBE2K, GLRX2	0.729683	100
Annotation Cluster 8	Enrichment Score: 0.5631379958645127
Category	Term	Count	Genes	PValue	FDR
UP_KEYWORDS	RNA-binding	4	DDX3X, EIF4A2, TSN, PUM2	0.146344	82.7869
UP_KEYWORDS	Hydrolase	6	DDX3X, EIF4A2, THSD4, MME, DPP8, TSN	0.296136	97.986
GOTERM_MF_DIRECT	GO:0016787~hydrolase activity	6	DDX3X, EIF4A2, THSD4, MME, DPP8, TSN	0.343642	99.1341
GOTERM_MF_DIRECT	GO:0008233~peptidase activity	3	THSD4, MME, DPP8	0.375384	99.5049
Annotation Cluster 9	Enrichment Score: 0.4781312914171198
Category	Term	Count	Genes	PValue	FDR
GOTERM_CC_DIRECT	GO:0005783~endoplasmic reticulum	6	SH3GLB1, BNIP3L, BCAP29, SAR1B, TPD52, REEP3	0.195155	91.4309
UP_KEYWORDS	Endoplasmic reticulum	4	BNIP3L, BCAP29, SAR1B, REEP3	0.377954	99.4903
GOTERM_CC_DIRECT	GO:0005789~endoplasmic reticulum membrane	3	BCAP29, SAR1B, REEP3	0.49864	99.9596
Annotation Cluster 10	Enrichment Score: 0.11053887130033598
Category	Term	Count	Genes	PValue	FDR
UP_KEYWORDS	Metal-binding	8	YPEL5, RIOK3, VSNL1, MME, CP, SAR1B, PRDM16, GLRX2	0.636646	99.9987
GOTERM_MF_DIRECT	GO:0046872~metal ion binding	8	YPEL5, RIOK3, VSNL1, MME, CP, SAR1B, PRDM16, GLRX2	0.768302	100
UP_KEYWORDS	Zinc	3	YPEL5, MME, PRDM16	0.952693	100
Annotation Cluster 11	Enrichment Score: 0.0850997690882622
Category	Term	Count	Genes	PValue	FDR
GOTERM_CC_DIRECT	GO:0016020~membrane	18	NAP1L1, MME, NDUFC1, REEP3, CD24A, SLC7A11, CUL3, STX12, DDX3X, SH3GLB1, BNIP3L, VSNL1, NPTN, BCAP29, TOM1, SYPL, VPS35, SAR1B	0.478378	99.9367
UP_KEYWORDS	Membrane	18	MME, NDUFC1, TPD52, REEP3, CD24A, SLC7A11, DMXL1, STX12, DDX3X, SH3GLB1, BNIP3L, NPTN, BCAP29, TOM1, SYPL, VPS35, CP, SAR1B	0.777685	100
UP_SEQ_FEATURE	topological domain:Cytoplasmic	6	STX12, BCAP29, NPTN, MME, SYPL, SLC7A11	0.910511	100
GOTERM_CC_DIRECT	GO:0016021~integral component of membrane	13	DMXL1, STX12, BNIP3L, BCAP29, NPTN, MME, SYPL, VPS35, NDUFC1, CP, TPD52, REEP3, SLC7A11	0.925252	100
UP_SEQ_FEATURE	transmembrane region	9	STX12, BNIP3L, BCAP29, NPTN, MME, SYPL, NDUFC1, REEP3, SLC7A11	0.927323	100
UP_KEYWORDS	Transmembrane helix	12	DMXL1, STX12, BNIP3L, BCAP29, NPTN, MME, SYPL, NDUFC1, CP, TPD52, REEP3, SLC7A11	0.933561	100
UP_KEYWORDS	Transmembrane	12	DMXL1, STX12, BNIP3L, BCAP29, NPTN, MME, SYPL, NDUFC1, CP, TPD52, REEP3, SLC7A11	0.934991	100
Annotation Cluster 12	Enrichment Score: 0.06833633861807337
Category	Term	Count	Genes	PValue	FDR
UP_KEYWORDS	DNA-binding	4	DDX3X, GPBP1, TSN, PRDM16	0.696338	99.9998
GOTERM_MF_DIRECT	GO:0003677~DNA binding	5	DDX3X, GPBP1, TSN, PDCD5, PRDM16	0.698857	99.9999
UP_KEYWORDS	Transcription regulation	3	DDX3X, GPBP1, PRDM16	0.915057	100
UP_KEYWORDS	Transcription	3	DDX3X, GPBP1, PRDM16	0.924283	100
GOTERM_BP_DIRECT	GO:0006351~transcription, DNA-templated	3	DDX3X, GPBP1, PRDM16	0.960025	100
GOTERM_BP_DIRECT	GO:0006355~regulation of transcription, DNA-templated	3	DDX3X, GPBP1, PRDM16	0.984551	100
Annotation Cluster 13	Enrichment Score: 0.009955809399844064
Category	Term	Count	Genes	PValue	FDR
UP_KEYWORDS	Disulfide bond	5	NPTN, MME, CP, SLC7A11, GLRX2	0.927512	100
UP_SEQ_FEATURE	disulfide bond	4	NPTN, MME, CP, GLRX2	0.974674	100
UP_KEYWORDS	Glycoprotein	5	NPTN, MME, SYPL, CP, CD24A	0.97774	100
UP_SEQ_FEATURE	glycosylation site:N-linked (GlcNAc...)	5	NPTN, MME, SYPL, CP, CD24A	0.992699	100
UP_SEQ_FEATURE	signal peptide	4	THSD4, NPTN, CP, CD24A	0.994471	100
UP_KEYWORDS	Cell membrane	3	NPTN, MME, CD24A	0.998741	100
